# Supplementary material for: Microbial Fermentation of Industrial Rice-Starch Byproduct as Valuable Source of Peptide Fractions with Health-Related Activity
Source: MDPI journal article supplement (doi:10.3390/microorganisms8070986), 2020-06-30
Supplement: s1 [file s1]

**Figure S1.** SDS-PAGE 14% of the initial rice-starch byproduct (BR): 1) total sample; 2) solid fraction; 3) liquid phase (in a 25:1 ratio with respect to total and pellet samples). Mk: MW marker.

**Figure S2.** Protein concentration (g/L, A) and antioxidant activity measured by ABTS (mg AA eq/L, B) and DPPH (mg AA eq/L, C) assays, of: rice protein byproduct (BR) control at time 0 (diagonal lines); BR and BR inoculated with 11 different lactic acid bacterial strains (LfMR13, Lp6BHI, LrC1122, Lp325, Lp82, Lclbcd, LrC249, LfPRFE, LpPRPL, LrPRRH, LbPRBU), at 72 h incubation time (gray). Means followed by the same letter did not differ significantly (Tukey test,  $p>0.05$ ).

**Figure S3.** Tricine SDS-PAGE of BR at time 0 (T0) and after 72 h incubation with LAB strains LrC1112 (A), Lp82 (B) and LrPRRH (C), in 1 L large-scale experiments. Mk: MW marker.

**Figure S4.** PCR agarose gel of LAB after a 72 h fermentation in BR+FS substrate

X taq = Not inoculated + Taq polymerase; X hifi = Not inoculated + Platinum HI-FI polymerase; LCtaq = LrC1122 + Taq polymerase; LChifi = LrC1122 + Platinum HI-FI polymerase; L8taq = Lp82 + Taq polymerase; L8hifi = Lp82 + Platinum HI-FI polymerase; LPtaq = LrPRRH + Taq polymerase; LPhifi = LrPRRH + Platinum HI-FI polymerase.

**Figure S1**

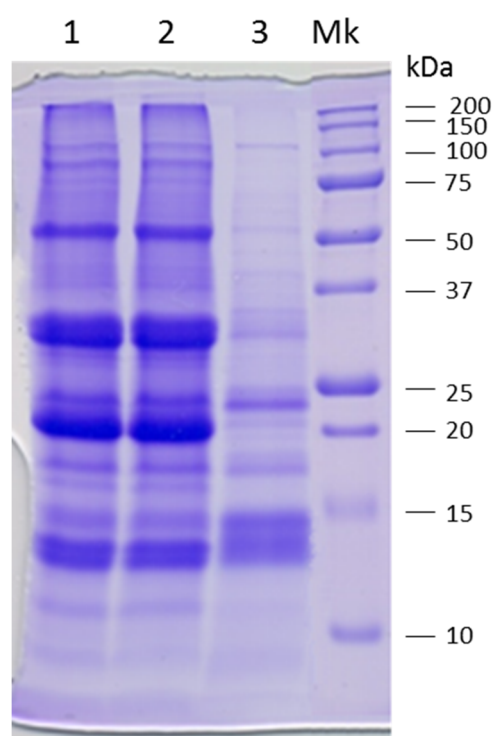

Figure S2

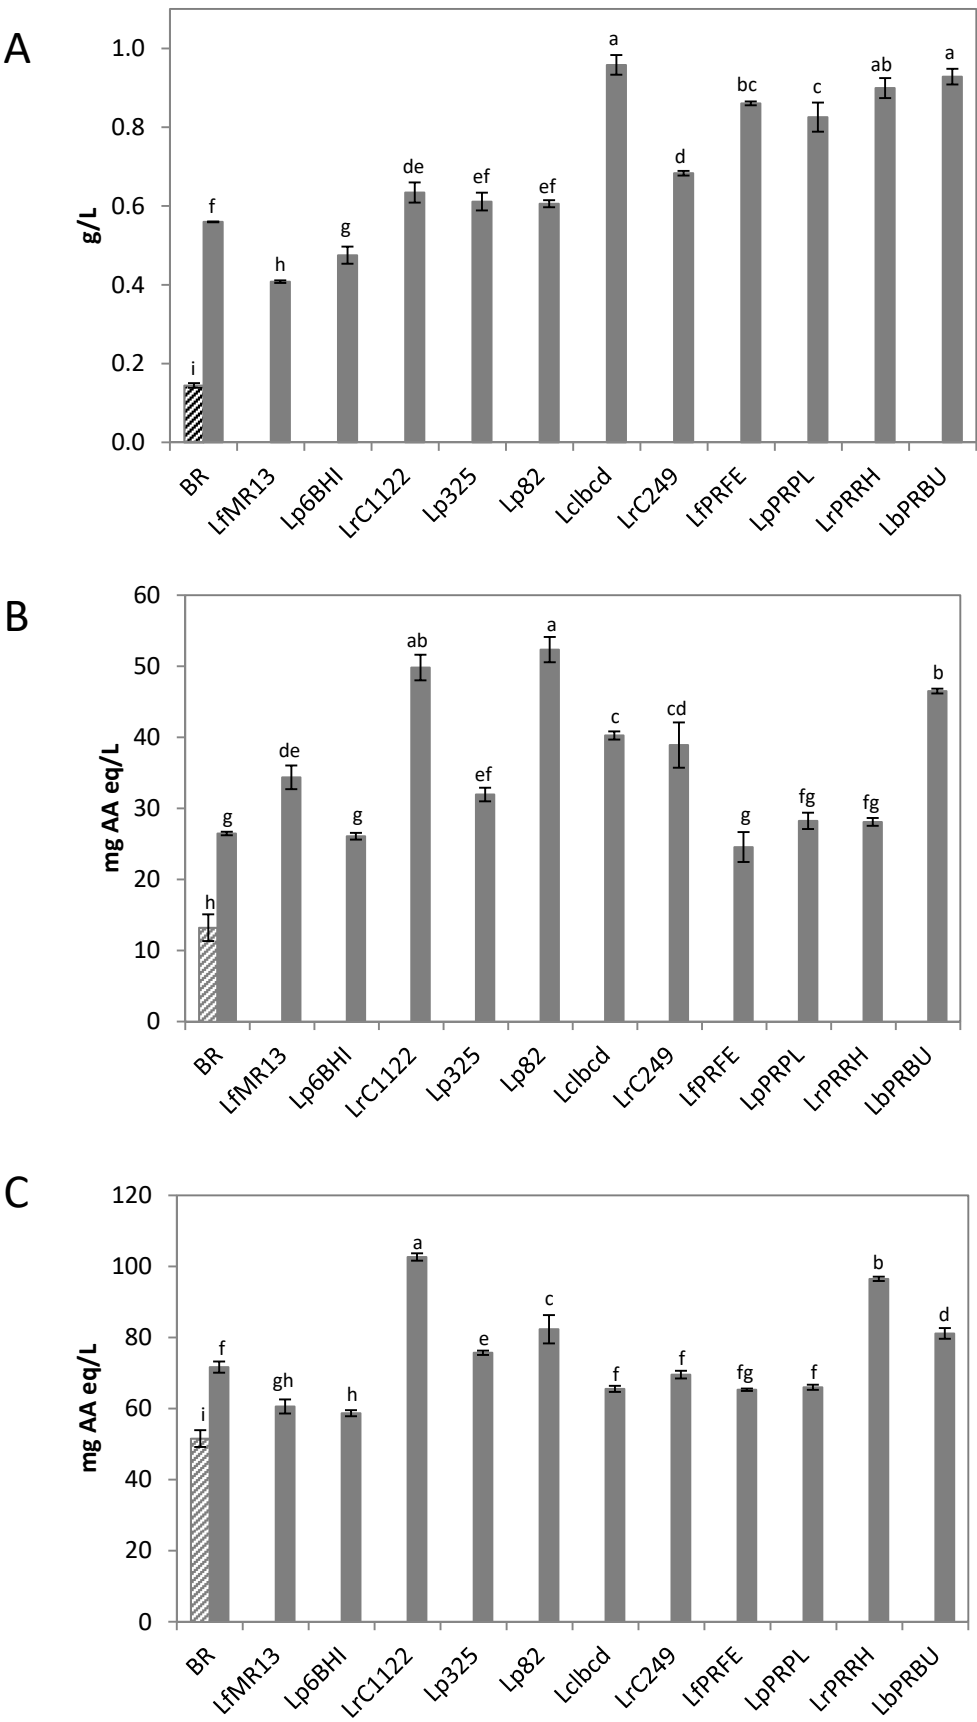

Figure S3.

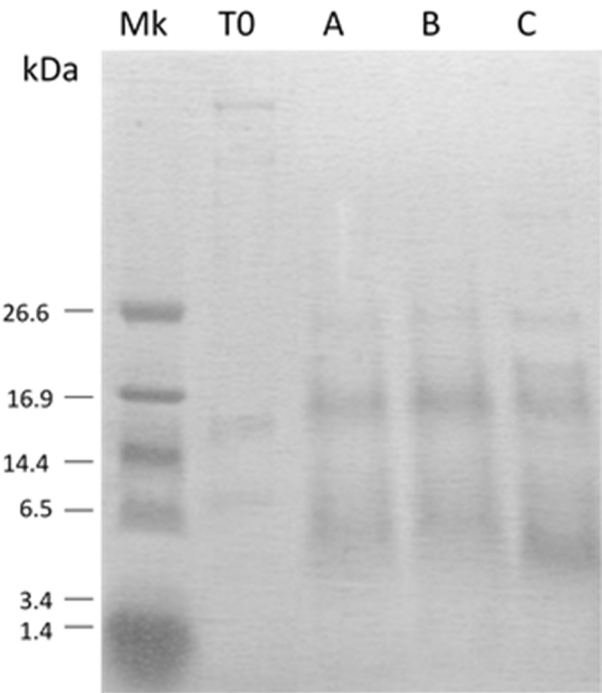

Figure S4

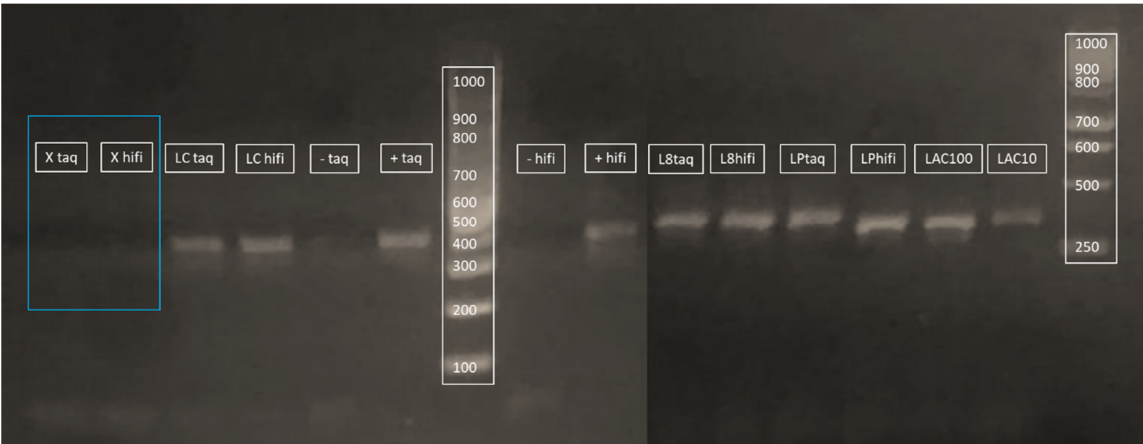

**Table S1.** pH dynamics, number of viable LAB cells (Log CFU/g), protein concentration (g/L), and antioxidant activity (mg AA eq/L) measured by ABTS assay, at incubation times 0, 24, 48 and 72 h, of BR incubated with LAB strains LrC11122, Lp82 and LrPRRH in 1L large-scale experiments.

|                        | 0h           | 24h          | 48h          | 72h          |
|------------------------|--------------|--------------|--------------|--------------|
| <b>LrC11122</b>        |              |              |              |              |
| pH                     | 5.10 ± 0.01  | 3.72 ± 0.04  | 3.62 ± 0.03  | 3.63 ± 0.02  |
| LAB cells <sup>1</sup> | 9.38 ± 0.09  | 8.28 ± 0.07  | 8.35 ± 0.08  | 8.52 ± 0.10  |
| Proteins <sup>2</sup>  | 0.88 ± 0.04  | 2.51 ± 0.02  | 3.32 ± 0.04  | 3.58 ± 0.01  |
| AA <sup>3</sup>        | 22.19 ± 0.68 | 41.67 ± 0.57 | 49.61 ± 0.68 | 50.59 ± 0.50 |
| <b>Lp82</b>            |              |              |              |              |
| pH                     | 5.22 ± 0.01  | 3.91 ± 0.03  | 3.67 ± 0.02  | 3.65 ± 0.01  |
| LAB cells <sup>1</sup> | 9.39 ± 0.07  | 8.36 ± 0.10  | 8.35 ± 0.08  | 8.23 ± 0.07  |
| Proteins <sup>2</sup>  | 0.73 ± 0.01  | 2.41 ± 0.03  | 3.40 ± 0.03  | 4.25 ± 0.01  |
| AA <sup>3</sup>        | 20.45 ± 0.57 | 42.10 ± 0.82 | 42.65 ± 0.86 | 44.93 ± 0.33 |
| <b>LrPRRH</b>          |              |              |              |              |
| pH                     | 5.20 ± 0.02  | 3.89 ± 0.01  | 3.81 ± 0.04  | 3.87 ± 0.03  |
| LAB cells <sup>1</sup> | 9.53 ± 0.10  | 8.02 ± 0.07  | 7.86 ± 0.08  | 7.90 ± 0.07  |
| Proteins <sup>2</sup>  | 0.79 ± 0.03  | 2.47 ± 0.02  | 3.07 ± 0.03  | 3.93 ± 0.01  |
| AA <sup>3</sup>        | 20.67 ± 0.75 | 41.45 ± 0.50 | 51.24 ± 0.50 | 53.75 ± 0.98 |

<sup>1</sup> Viable LAB cells (Log CFU/g)

<sup>2</sup> Protein concentration (g/L)

<sup>3</sup> Antioxidant activity (mg AA eq/L)
